# Supplementary material for: Organic Solar Cells Improved by Optically Resonant Silicon Nanoparticles
Source: MDPI journal article supplement (doi:10.3390/nano12213916), 2022-11-06
Supplement: s1 [file s1]

## Supplementary Materials

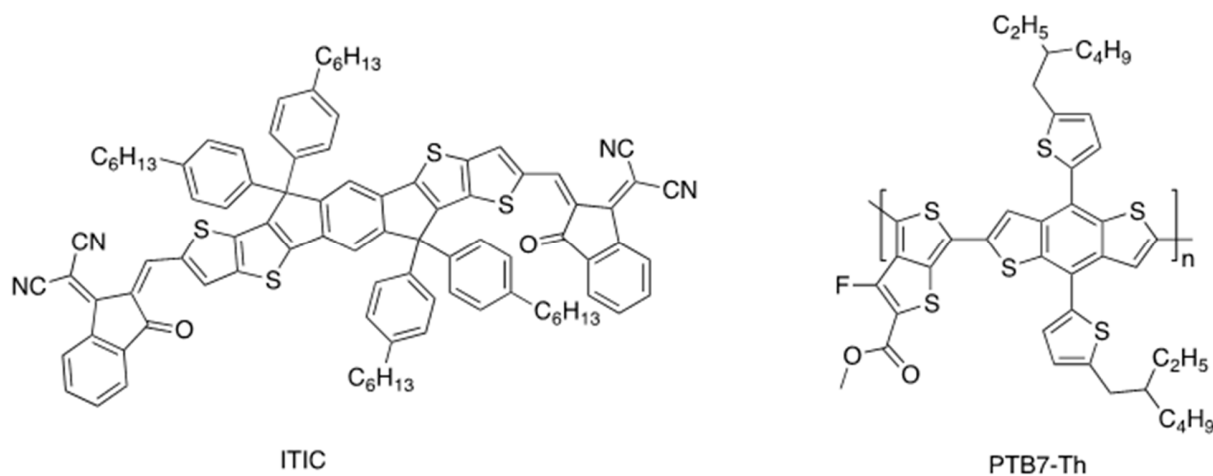

**Figure S1.** Chemical of nonfullerene acceptor ITIC (3,9-bis(2-methylene-(3-(1,1-dicyanomethylene)-indanone)-5,5,11,11-tetrakis(4-hexylphenyl)-dithieno[2,3-d':2',3'-d']-s-indaceno[1,2-b:5,6-b']-dithiophene) and repeat unit structures of donor polymer molecules PTB7-Th (PBDTTT-EFT, Poly-[4,8-bis-(5-(2-ethylhexyl)-thiophen-2-yl)benzo-[1,2-b;4,5-b']-dithiophene-2,6-diyl-alt-(4-(2-ethylhexyl)-3-fluorothieno-[3,4-b]thiophene)-2-carboxylate-2,6-diyl)]) used in the study.

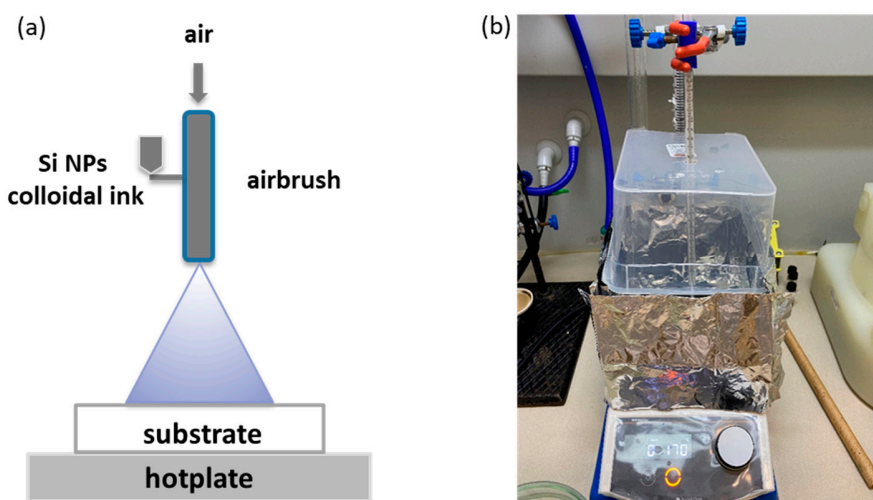

**Figure S2.** A schematic diagram of the spray coating technique (a) and photo of the setup (b).

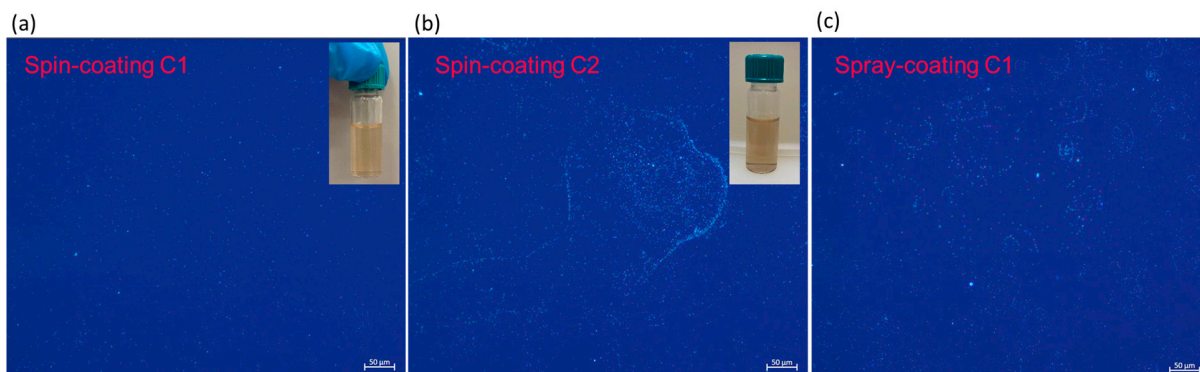

**Figure S3.** Optical images in the dark-field scheme of silicon nanoparticles deposited on ZnO interlayer by spin-coating and spray-coating techniques: (a) spin-coating of diluted colloidal Si NPs ink (C1); (b) spin-coating of ink with higher concentration of Si NPs (C2); (c) spray-coating of ink with concentration C1.

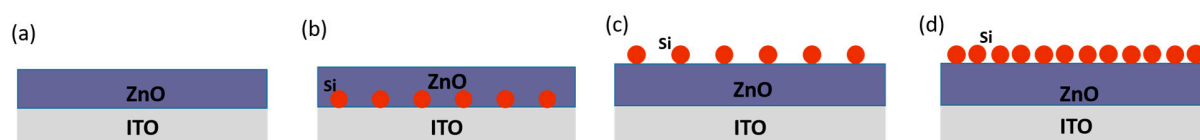

**Figure S4.** Schematic drawings of OPV devices without dielectric nanoparticles (a) and with dielectric Si nanoparticles incorporated in the buffer layer ZnO (b), c) Si NPs deposited ZnO/ITO substrates (ZnO/Si) with fewer concentrations (C1), and d) Si NPs deposited on ZnO/ITO substrate with higher concentrations (C2).

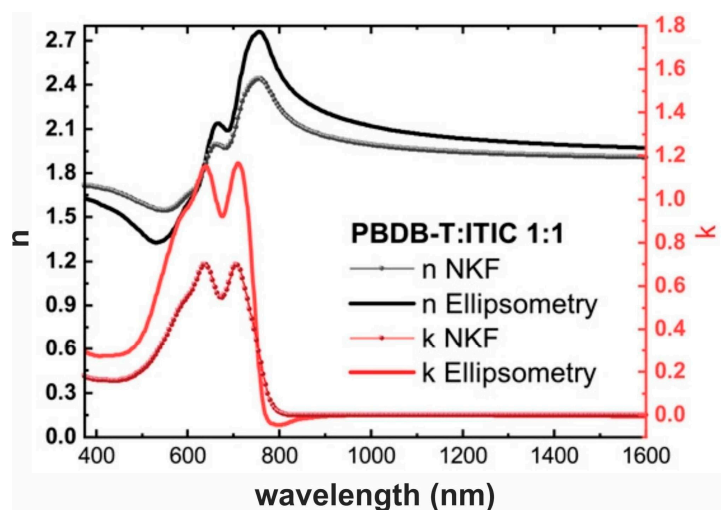

**Figure S5.** Optical properties of PTB7-Th:ITIC. n - refractive index, k - extinction coefficient. Data is taken from Ref.[1].

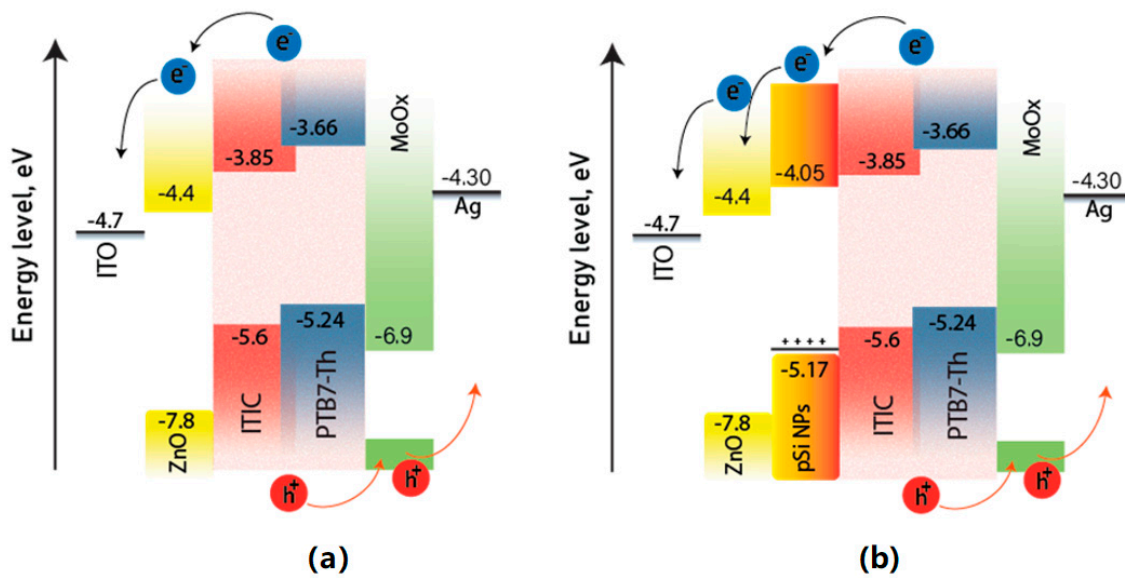

**Figure S6.** (a) Energy band diagram of the device without and (b) with Si NPs.

**Table S1.** Comparison of Photovoltaic performance enhancement of OSCs devices with plasmonic Au NPs [2] and dielectric Si NPs (our work) for the same photoactive layer.

|                                             | $\Delta V_{oc}$<br>V | $\Delta I_{sc}$<br>mA/cm <sup>2</sup> | $\Delta FF$<br>% | $\Delta PCE$ relative<br>% |
|---------------------------------------------|----------------------|---------------------------------------|------------------|----------------------------|
| ZnO:0.05 wt% Au NPs                         | -1.4%                | +15%                                  | +7%              | +24%                       |
| Our work Si NPs with average size of 150 nm | +2%                  | +11%                                  | +13%             | +25%                       |

**References:**

- [1] Kerremans, R.; Kaiser, C.; Li, W.; Zarrabi, N.; Meredith, P.; Armin, A. The Optical Constants of Solution-Processed Semiconductors—New Challenges with Perovskites and Non-Fullerene Acceptors. *Advanced Optical Materials* 2020, 8(16), 2000319
- [2] Usmani, B; Ranjan, R.; Prateek, Gupta, S. K.; Gupta, R.K.; Nalwa, K. S.; Garg, A.; Inverted PTB7-Th:PC71BM organic solar cells with 11.8% PCE via incorporation of gold nanoparticles in ZnO electron transport layer. *Solar Energy* 2021, 214, 220-230
